# Supplementary material for: Probing the electronic structure and Au–C bonding in AuC2nH (n= 4–7) using photoelectron imaging spectroscopy and quantum chemical calculations
Source: Royal Society of Chemistry journal article supplement (doi:10.1039/d1cp05057e), 2022-01-01
Supplement: d1cp05057e1.pdf [file d1cp05057e1.pdf]

## Supporting Information

Probing the electronic structure and Au–C bonding in  $\text{AuC}_{2n}\text{H}$  ( $n = 4-7$ )  
using photoelectron imaging spectroscopy and quantum chemical  
calculations

Changcai Han,<sup>‡a,b</sup> Xiao-Gen Xiong<sup>‡c</sup>, Jing Hong,<sup>a,b</sup> Shuai-Ting Yan,<sup>b,d</sup> Zejie Fei,<sup>a</sup> Hongtao Liu<sup>a</sup>, and Changwu Dong,<sup>\*a</sup>

<sup>a</sup>Key Laboratory of Interfacial Physics and Technology, Shanghai Institute of Applied Physics, Chinese Academy of Sciences, Shanghai 201800, P. R. China

<sup>b</sup>University of Chinese Academy of Sciences, Beijing 100049, P. R. China

<sup>c</sup>Sino-French Institute of Nuclear Engineering and Technology, Sun Yat-sen University, Zhuhai 519082, P. R. China

<sup>d</sup>Beijing National Laboratory for Molecular Sciences (BNLMS), State Key Laboratory of Molecular Reaction Dynamics, Institute of Chemistry, Chinese Academy of Sciences, Beijing 100190, China

<sup>‡</sup> These authors contributed equally to this work.

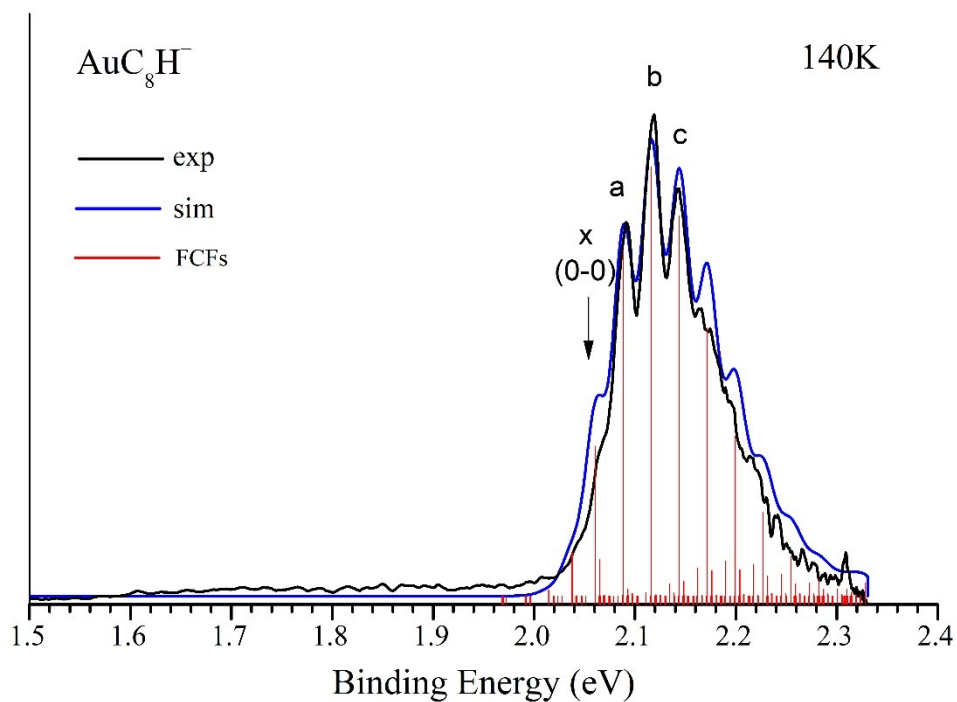

**Fig.S1** The PE spectrum (black) at 532 nm, FC simulated curve (blue), and calculated FC factors (red stick) for Au-C stretching vibrational transition, using CAM-B3LYP geometries, frequencies, and of ground anionic and neutral  $\text{AuC}_8\text{H}$  are shown to make comparison. The assignment of 0-0 transition peak at 2.063 eV is given.

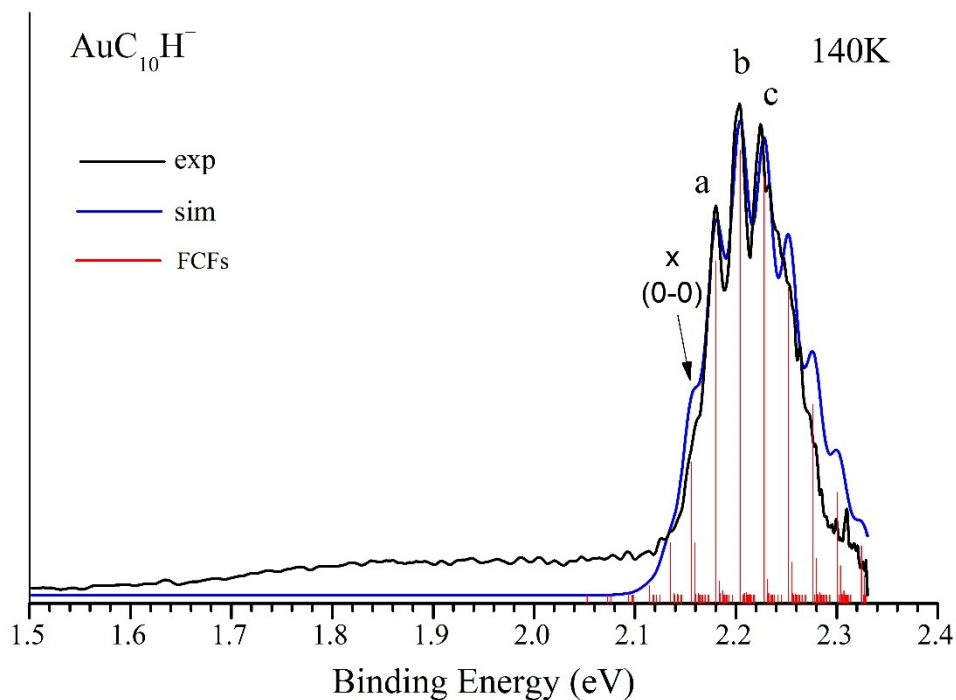

**Fig.S2** The PE spectrum (black) at 532 nm, FC simulated curve (blue), and calculated FC factors (red stick) for Au-C stretching vibrational transition, using CAM-B3LYP geometries, frequencies, and of ground anionic and neutral  $\text{AuC}_{10}\text{H}$  are shown to make comparison. The assignment of 0-0 transition peak at 2.157 eV is given.

Since electronic bonding energy is close to the detachment photo energy, the PE spectra for  $\text{AuC}_{12}\text{H}^-$  and  $\text{AuC}_{14}\text{H}^-$  are incomplete and difficult to give the FC simulation. For  $\text{AuC}_{12}\text{H}^-$  and  $\text{AuC}_{14}\text{H}^-$ , the 0-0 transition (labeled as  $x$ ) are extrapolated to the position at the lower energy of peak  $a$  by one vibrational quantum of Au-C stretching mode in the neutral ground state.

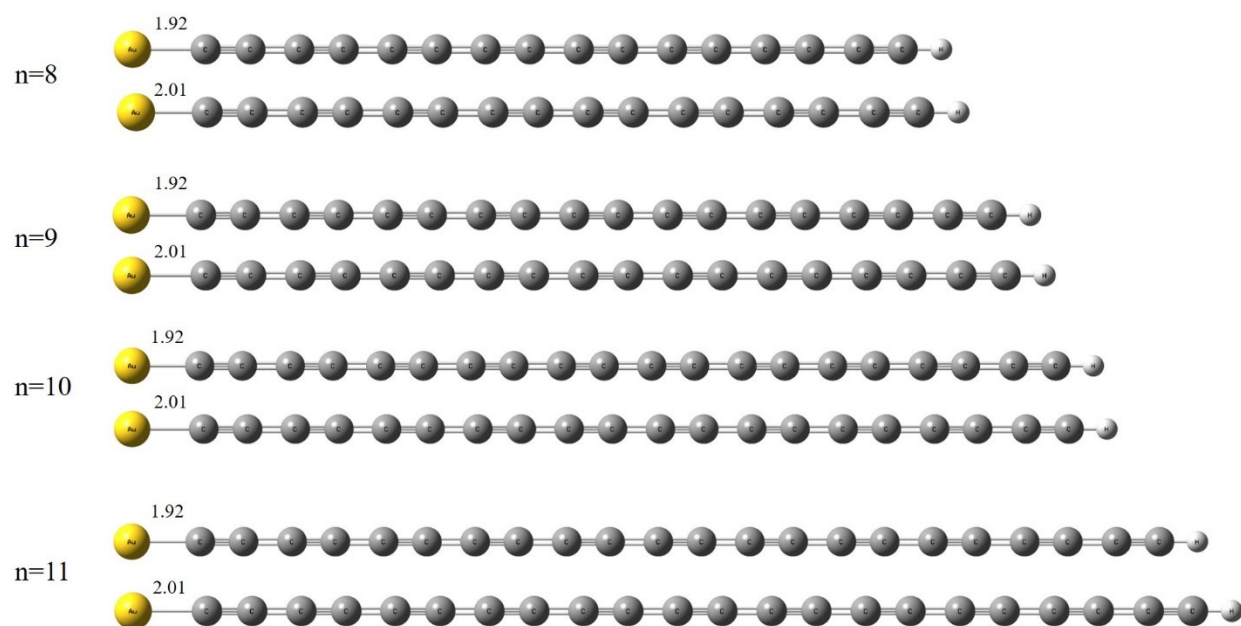

**Fig.S3** Optimized molecule structures of  $\text{AuC}_{2n}\text{H}^-$  (n = 8-11) and their corresponding neutrals at the CAM-B3LYP/AVTZ level. For each n, the bottom shows the anion structure, while the top structure is for the neutral. All bond lengths are shown in Å.

**Table S1.** The theoretical ADEs of  $\text{AuC}_{2n}\text{H}^-$  ( $n = 8-11$ ) at CAM-B3LYP/AVTZ level.

| Number of n | CAM-B3LYP (eV) |
|-------------|----------------|
| 8           | 2.301          |
| 9           | 2.325          |
| 10          | 2.346          |
| 11          | 2.357          |
